# Supplementary material for: GOAnnotator: linking protein GO annotations to evidence text.
Source: Springer Nature journal article supplement (doi:10.1186/1747-5333-1-19), 2006-01-01
Supplement: 13009_2006_12_MOESM1_ESM.pdf [file 13009_2006_12_MOESM1_ESM.pdf]

| PubMedId                            | Title                                                                                                                                                                    | Most Similar Term Extracted                        | Scope              | Authors | Year | Extract                                                                                                                | AddText                                                                               |
|-------------------------------------|--------------------------------------------------------------------------------------------------------------------------------------------------------------------------|----------------------------------------------------|--------------------|---------|------|------------------------------------------------------------------------------------------------------------------------|---------------------------------------------------------------------------------------|
| <a href="#">11594756(Full Text)</a> | Distinct phosphoinositide binding specificity of the GAP1 family proteins: characterization of the pleckstrin homology domains of MRASAL and KIAA0538.                   | 100% <a href="#">GTPase activator activity (f)</a> | GeneRIF            | 3       | 2001 | <br><a href="#">Pre-Processed</a>   |    |
| <a href="#">11448776(Full Text)</a> | CAPRI regulates Ca(2+)-dependent inactivation of the Ras-MAPK pathway.                                                                                                   | 100% <a href="#">GTPase activator activity (f)</a> | SEQUENCE FROM N.A. | 3       | 2001 | <br><a href="#">Pre-Processed</a>   |    |
| <a href="#">9628581(Full Text)</a>  | Prediction of the coding sequences of unidentified human genes. IX. The complete sequences of 100 new cDNA clones from brain which can code for large proteins in vitro. | 28% <a href="#">cell communication (p)</a>         | SEQUENCE FROM N.A. | 7       | 1998 | <br><a href="#">Pre-Processed</a> |  |
| <a href="#">14702039(Full Text)</a> | Complete sequencing and characterization of 21,243 full-length human cDNAs.                                                                                              | -                                                  | GeneRIF            | 154     | 2004 | <br><a href="#">Pre-Processed</a> |  |
| <a href="#">12853948(Full Text)</a> | The DNA sequence of human chromosome 7.                                                                                                                                  | -                                                  | SEQUENCE FROM N.A. | 107     | 2003 | <br><a href="#">Pre-Processed</a> |  |
