# Supplementary material for: GOAnnotator: linking protein GO annotations to evidence text.
Source: Springer Nature journal article supplement (doi:10.1186/1747-5333-1-19), 2006-01-01
Supplement: 13009_2006_12_MOESM3_ESM.pdf [file 13009_2006_12_MOESM3_ESM.pdf]

|                                                                                        |                                                                                                                                                                                                                                                                                                                                                                                  |                                                                                                                                      |
|----------------------------------------------------------------------------------------|----------------------------------------------------------------------------------------------------------------------------------------------------------------------------------------------------------------------------------------------------------------------------------------------------------------------------------------------------------------------------------|--------------------------------------------------------------------------------------------------------------------------------------|
| <b>Similar GO Terms Extracted</b>                                                      | <b>GOA Electronic Term:</b> <a href="#">intracellular signaling cascade (p)</a> <input type="text" value="-"/>                                                                                                                                                                                                                                                                   |                                                                                                                                      |
| <a href="#">inactivation of MAPK (p)</a><br><input type="text" value="-"/>             | <p>CAPRI regulates Ca<sup>2+</sup>-dependent <b>inactivation</b> of the Ras-<b>MAPK</b> pathway Ca<sup>2+</sup> is a universal second messenger that is critical for cell growth and is intimately associated with many Ras-dependent cellular processes such as proliferation and differentiation [1].</p>                                                                      |                                                   |
| <a href="#">protein kinase C activation (p)</a><br><input type="text" value="-"/>      | <p>A role for intracellular Ca<sup>2+</sup> in the <b>activation</b> of Ras has been previously demonstrated, e.g., via the nonreceptor tyrosine <b>kinase</b> PYK2 [3] and by Ca<sup>2+</sup>/calmodulin-dependent guanine nucleotide exchange factors (GEFs) such as Ras-GRF [4]; however, there is no Ca<sup>2+</sup>-dependent mechanism for direct <b>inactivation</b>.</p> |                                                   |
| <a href="#">phosphoinositide-mediated signaling (p)</a> <input type="text" value="-"/> | <p>Previously, we have shown that these C2 domains do not regulate Ca<sup>2+</sup>-<b>mediated</b> membrane association; instead, membrane targeting is <b>mediated</b> by <b>phosphoinositide</b> binding PH domains [11, 12 and 13].</p>                                                                                                                                       |                                                 |
| <b>Comment:</b> <input type="text"/>                                                   |                                                                                                                                                                                                                                                                                                                                                                                  | <b>New Terms:</b> <input type="text"/><br><b>Evidence:</b> <input type="text" value="-"/> <input type="button" value="--- Add ---"/> |
